# Supplementary material for: Segmental differences of cervical spinal cord motion: advancing from confounders to a diagnostic tool
Source: PubMed Central journal article supplement (PMC6520379; doi:10.1038/s41598-019-43908-x), 2019-05-15
Supplement: 41598_2019_43908_MOESM1_ESM.pdf [file 41598_2019_43908_MOESM1_ESM.pdf]

## Supplementary information

### Segmental differences of cervical spinal cord motion: advancing from confounders to a diagnostic tool

Hupp M<sup>1\*</sup>, Vallotton K<sup>1</sup>, Brockmann C<sup>1</sup>, Huwyler S<sup>1</sup>, Rosner J<sup>1</sup>, Sutter R<sup>2</sup>, Klarhoefer M<sup>3</sup>, Freund P<sup>1</sup>, Farshad M<sup>4</sup>, Curt A<sup>1,4</sup>

1 Spinal Cord Injury Center, Balgrist University Hospital, Zurich, Switzerland

2 Radiology, Balgrist University Hospital, Zurich, Switzerland

3 Siemens Healthcare AG, Zurich, Switzerland

4 University Spine Centre Zurich, Balgrist University Hospital, Zurich, Switzerland

\*corresponding author

Hupp Markus

University Hospital Balgrist

Spinal Cord Injury Centre

Forchstr. 340

8008 Zurich

Switzerland

Email: [Markus.Hupp@gmx.de](mailto:Markus.Hupp@gmx.de)

Phone 0041-44-386-3905

|           | amplitude |       | max. cranial |       | max. caudal |       | displacement |       |
|-----------|-----------|-------|--------------|-------|-------------|-------|--------------|-------|
|           | mean      | SD    | mean         | SD    | mean        | SD    | mean         | SD    |
| <b>C2</b> | 0.296     | 0.088 | 0.328        | 0.050 | 0.032       | 0.063 | 0.186        | 0.033 |
| <b>C3</b> | 0.335     | 0.108 | 0.340        | 0.045 | 0.005       | 0.081 | 0.185        | 0.032 |
| <b>C4</b> | 0.387     | 0.139 | 0.358        | 0.046 | -0.031      | 0.106 | 0.181        | 0.030 |
| <b>C5</b> | 0.445     | 0.163 | 0.374        | 0.082 | -0.071      | 0.099 | 0.176        | 0.035 |
| <b>C6</b> | 0.358     | 0.095 | 0.339        | 0.053 | -0.019      | 0.068 | 0.165        | 0.040 |
| <b>C7</b> | 0.339     | 0.083 | 0.365        | 0.062 | 0.026       | 0.100 | 0.181        | 0.063 |

**Supp. table 1 Uncorrected segmental spinal cord motion readouts**

Values of spinal cord motion were calculated with the collected raw velocity values in each cervical segment without correction for confounders. Displayed are the values for the amplitude (cm/s), maximum caudal velocity (cm/s), maximum cranial velocity (cm/s) and for the displacement (cm).

max = maximum, SD = standard deviation

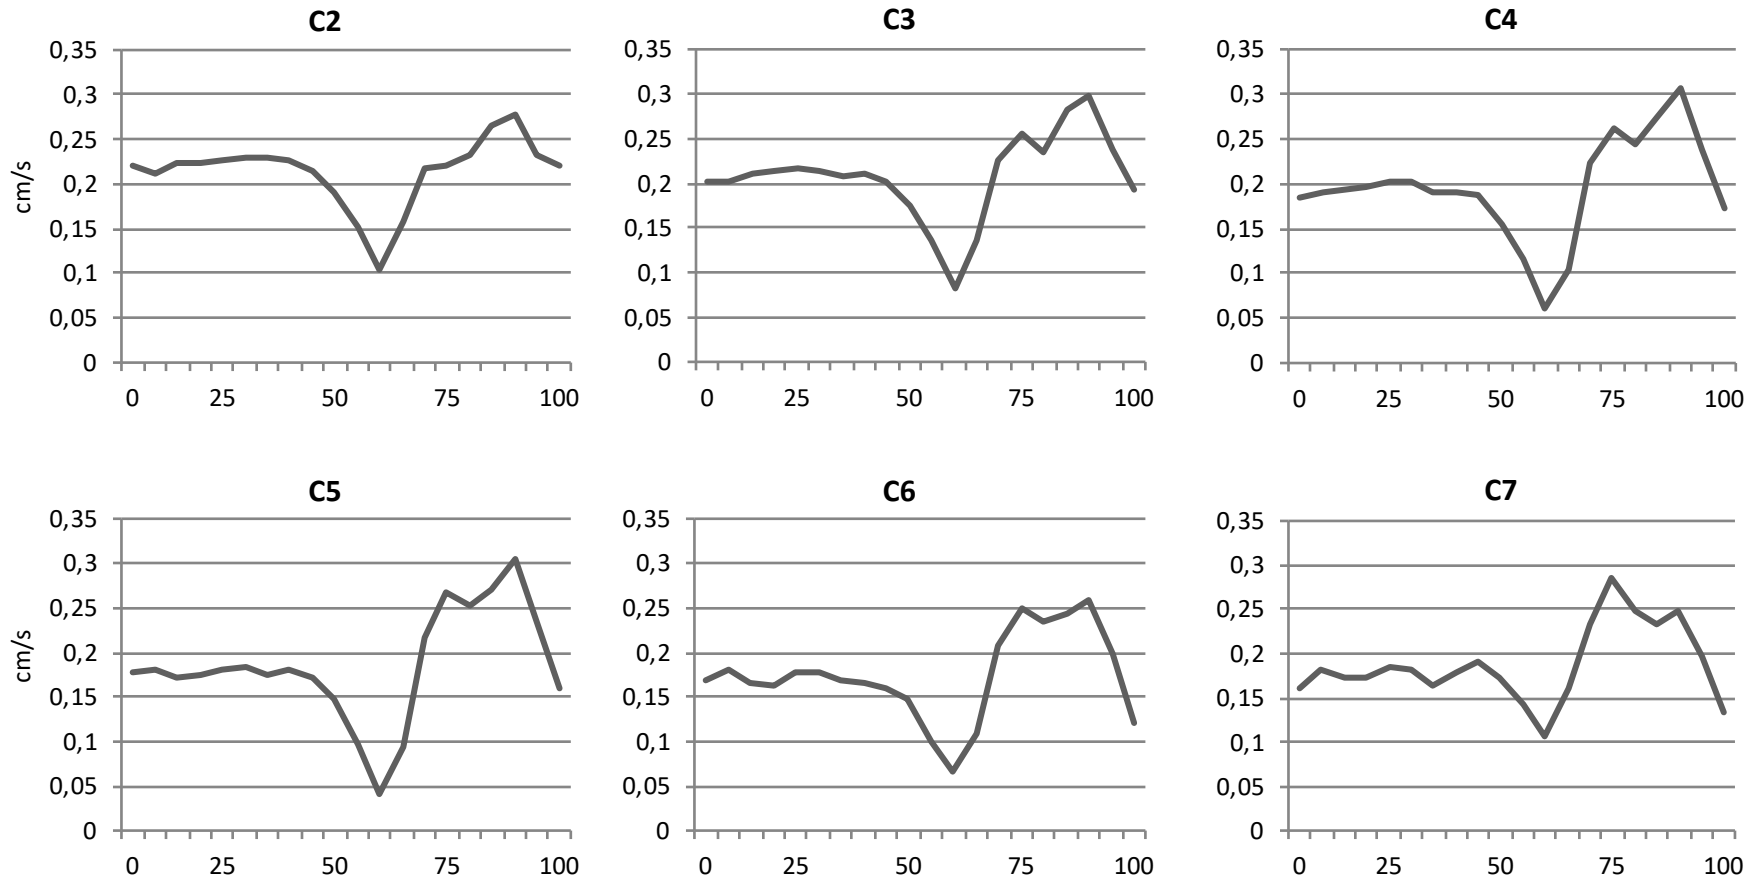

**Supp. figure 1 Uncorrected spinal cord motion signal in each cervical segment during one heartcycle**

Velocity signal (cm/s) was collected in 18 healthy volunteers. The curves represent the group mean of uncorrected raw values in 20 timepoints during one heartcycle (0-100 %) triggered by peripheral pulse signal. A positive “phase drift” respectively offset error with misleading high velocity values could be observed in all segments.
